# Supplementary material for: Interfacial and morphological features of a twist-bend nematic drop
Source: Royal Society of Chemistry journal article supplement (doi:10.1039/c6sm00482b), 2016-01-01
Supplement: c6sm00482b1.pdf [file c6sm00482b1.pdf]

# Equilibrium shapes of a twist-bend nematic drop

Kanakapura S. Krishnamurthy,<sup>a</sup> Pramoda Kumar,<sup>b</sup> Nani B. Palakurthy,<sup>a</sup> Channabasaveshwar V. Yelamaggad,<sup>a</sup> and Epifanio G. Virga<sup>\*c</sup>

These notes supplement our paper *Interfacial and morphological features of a twist-bend nematic drop*, producing a number of analytical details of the mathematical model employed there to interpret the experimental observations of equilibrium shapes of a twist-bend nematic drop in two space dimensions. For the sake of continuity and completeness, some figures and equations are also reproduced here.

## 1 Equilibrium equations

Our starting point here is the energy functional

$$F[\mathbf{r}] := \int_0^L \left\{ 1 + \frac{1}{2}\omega [(\mathbf{t} \cdot \mathbf{n})^2 - c^2]^2 \right\} ds, \quad (1)$$

where  $L$  is the (undetermined) length of the curve  $\mathcal{C}$  bounding the drop,  $\mathbf{t}$  is a unit tangent vector to  $\mathcal{C}$ , and  $s$  is the corresponding arc-length co-ordinate, so that  $\mathcal{C}$  is described by the mapping  $s \mapsto \mathbf{r}(s)$  and  $\mathbf{t} = \mathbf{r}'$ , where a prime ' denotes differentiation with respect to  $s$ .

Figure 1a illustrates an admissible shape for  $\mathcal{C}$ , symmetric with respect to both axes  $x$  and  $y$ , the former designating the orientation of  $\mathbf{n}$ . The area  $A$  enclosed by  $\mathcal{C}$  can be expressed in terms of  $\mathbf{r}$  as

$$A[\mathbf{r}] := -\frac{1}{2} \int_0^L \mathbf{r} \times \mathbf{t} \cdot \mathbf{e}_z ds, \quad (2)$$

where  $\mathbf{e}_z := \mathbf{e}_x \times \mathbf{e}_y$ .

Constrained equilibrium for  $F$  requires that  $\mathbf{r}$  makes the first variations  $\delta F$  and  $\delta A$  proportional to one another,

$$\delta F = \lambda \delta A, \quad (3)$$

where  $\lambda$  is a Lagrange multiplier, still to be determined. The first variation  $\delta F$  is a functional,  $\delta F(\mathbf{r})[\mathbf{u}]$ , linear in the variation  $\mathbf{u}$  of  $\mathbf{r}$ . Formally,

$$\delta F(\mathbf{r})[\mathbf{u}] := \left. \frac{d}{ds} F[\mathbf{r}_\varepsilon] \right|_{\varepsilon=0}, \quad (4)$$

where  $\mathbf{r}_\varepsilon := \mathbf{r} + \varepsilon \mathbf{u}$  and  $\varepsilon$  is a small, perturbation parameter. The perturbed curve  $\mathcal{C}_\varepsilon$  described by  $\mathbf{r}_\varepsilon$  has unit tangent vector  $\mathbf{t}_\varepsilon$  delivered by

$$\mathbf{t}_\varepsilon = \mathbf{t} + \varepsilon(\mathbf{I} - \mathbf{t} \otimes \mathbf{t})\mathbf{u}' + o(\varepsilon), \quad (5)$$

<sup>a</sup> Centre for Nano and Soft Matter Sciences, P. O. Box 1329, Jalahalli, Bangalore 560013, India. E-mail: murthyksk@gmail.com

<sup>b</sup> The Jacob Blaustein Institutes for Desert Research, Ben-Gurion University of the Negev, Sede Boqer Campus, Israel 8499000.

<sup>c</sup> Dipartimento di Matematica, Università di Pavia, Via Ferrata 5, I-27100 Pavia, Italy. E-mail: eg.virga@unipv.it

where  $\mathbf{I}$  is the identity tensor. Moreover, the local dilation ratio between lengths along  $\mathcal{C}_\varepsilon$  and lengths along  $\mathcal{C}$  is, to within first order in  $\varepsilon$ ,  $1 + \varepsilon \mathbf{t} \cdot \mathbf{u}'$ . Thus, by letting  $\mathbf{n} = \mathbf{e}_x$  from (1) and (4) we obtain

$$\begin{aligned} \delta F(\mathbf{r})[\mathbf{u}] = & \int_0^L \left\{ 2\omega [(\mathbf{t} \cdot \mathbf{e}_x)^2 - c^2] (\mathbf{I} - \mathbf{t} \otimes \mathbf{t})\mathbf{e}_x \right. \\ & \left. + \left( 1 + \frac{1}{2}\omega [(\mathbf{t} \cdot \mathbf{e}_x)^2 - c^2]^2 \right) \mathbf{t} \right\} \cdot \mathbf{u}' ds. \end{aligned} \quad (6)$$

Similarly, we arrive at

$$\delta A(\mathbf{r})[\mathbf{u}] = \frac{1}{2} \int_0^L (\boldsymbol{\nu} \cdot \mathbf{u} - \mathbf{e}_z \times \mathbf{r} \cdot \mathbf{u}') ds, \quad (7)$$

where  $\boldsymbol{\nu} := \mathbf{e}_z \times \mathbf{t}$  is the outer unit normal to  $\mathcal{C}$ .

As shown in Fig. 1a,  $\mathcal{C}$  may possess a *corner*, that is a point, say at  $s = s_0$ , where the unit tangent  $\mathbf{t}$  jumps from  $\mathbf{t}^-$  to  $\mathbf{t}^+$  as  $s$  increases through  $s_0$ . If this is the case, splitting the integral in (7) into subintervals where  $\mathbf{t}$  is continuous, allowing both  $\mathbf{u}$  and  $\mathbf{u}'$  to be everywhere continuous, and integrating by parts, we easily show that

$$\delta A(\mathbf{r})[\mathbf{u}] = \int_0^L \boldsymbol{\nu} \cdot \mathbf{u} ds. \quad (8)$$

Contrariwise, proceeding just in the same way, we extract a *jump* contribution to  $\delta F(\mathbf{r})$  from every point of discontinuity for  $\mathbf{t}$ , which reads as  $\llbracket \mathbf{f} \rrbracket \cdot \mathbf{u}$ , where

$$\begin{aligned} \mathbf{f} := & 2\omega [(\mathbf{t} \cdot \mathbf{e}_x)^2 - c^2] (\mathbf{t} \cdot \mathbf{e}_x) (\mathbf{I} - \mathbf{t} \otimes \mathbf{t})\mathbf{e}_x \\ & + \left( 1 + \frac{1}{2}\omega [(\mathbf{t} \cdot \mathbf{e}_x)^2 - c^2]^2 \right) \mathbf{t} \end{aligned} \quad (9)$$

and, as customary, for any discontinuous field  $\psi$  the *jump*  $\llbracket \psi \rrbracket$  is defined by  $\llbracket \psi \rrbracket := \psi^+ - \psi^-$ , where  $\psi^+$  and  $\psi^-$  are the right and left limits of  $\psi$  at the point of discontinuity.

Requiring (3) to be valid for arbitrary  $\mathbf{u}$ , by (6) and (8) we conclude that the equilibrium equation for the regular arcs of  $\mathcal{C}$ , where  $\mathbf{t}$  is continuous, is

$$\mathbf{f}' + \lambda \boldsymbol{\nu} = \mathbf{0}, \quad (10)$$

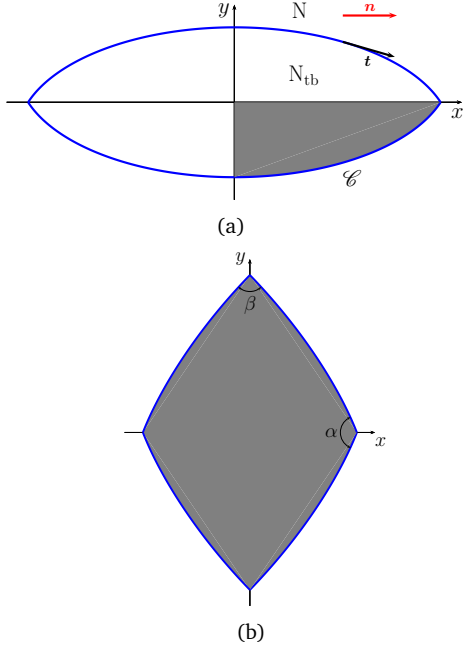

Fig. 1: (a) An admissible curve  $\mathcal{C}$  with a two-fold symmetry. The symmetry axis  $x$  designates the orientation of the uniformly aligned nematic phase, N. The region delimited by  $\mathcal{C}$  is occupied by the  $N_{tb}$  phase;  $\mathbf{t}$  is the tangent unit vector to  $\mathcal{C}$ , to be identified with the twist director on the drop's interface. The specific curve  $\mathcal{C}$  depicted here has a corner where it meets the  $x$  axis, whereas it is smooth where it meets the  $y$  axis. The gray quarter, which by repeated reflections covers the whole drop, admits a Cartesian representation,  $y = y(x)$ . (b) A two-fold symmetric shape exhibiting four corners on the symmetry axes;  $\alpha$  and  $\beta$  are the corresponding inner corner angles.

while the equation

$$[[\mathbf{f}]] = \mathbf{0} \quad (11)$$

must hold at all corners, where  $\mathbf{t}$  is discontinuous. These are precisely equations (8) and (9) in our main paper.

## 2 Equilibrium corners

In general, the equilibrium equations (10) and (11) are rather complicated. Symmetry may simplify them. In keeping with the experimental observations, we shall hereafter assume that  $\mathcal{C}$  has the two-fold symmetry displayed in Fig. 1 and that its corners may only occur on the symmetry axes.

For a corner on the  $y$  axis,  $\mathbf{t}^-$  and  $\mathbf{t}^+$  satisfy

$$\mathbf{t}^+ \cdot \mathbf{e}_x = \mathbf{t}^- \cdot \mathbf{e}_x, \quad \mathbf{t}^+ \cdot \mathbf{e}_y = -\mathbf{t}^- \cdot \mathbf{e}_y, \quad (12)$$

and it can be shown that equation (11) reduces to

$$3\omega\chi^2 - 2\omega c^2\chi - 2 - \omega c^4 = 0, \quad (13)$$

where we have set  $\chi := (\mathbf{t} \cdot \mathbf{e}_x)^2$ . It can be easily proved that there is precisely one root of (13) in  $[0, 1]$ , which reads

$$\chi = \chi_1(c, \omega) := \frac{1}{3} \left( c^2 + \sqrt{4c^4 + \frac{6}{\omega}} \right), \quad (14)$$

if and only if

$$\omega \geq \omega_c^{(1)}(c) := \frac{2}{(1-c^2)(3+c^2)}. \quad (15)$$

Otherwise, there is none and at equilibrium no corner can arise where  $\mathcal{C}$  meets the  $y$  axis. The inner corner angle  $\beta$  depicted in Fig. 1b is given by

$$\beta = 2 \arcsin \sqrt{\chi_1}, \quad (16)$$

where  $\chi_1$  is as in (14); in particular, (16) implies that

$$\lim_{\omega \rightarrow \infty} \beta(c, \omega) = 2 \arcsin c. \quad (17)$$

Similarly, for a corner on the  $x$  axis,

$$\mathbf{t}^+ \cdot \mathbf{e}_x = -\mathbf{t}^- \cdot \mathbf{e}_x, \quad \mathbf{t}^+ \cdot \mathbf{e}_y = \mathbf{t}^- \cdot \mathbf{e}_y \quad (18)$$

and (11) reduces to

$$3\omega\chi^2 - 2\omega(c^2 + 2)\chi - (\omega c^4 - 4\omega c^2 + 2) = 0. \quad (19)$$

It can be easily proved that there is precisely one admissible root of (19), which reads

$$\chi = \chi_2(c, \omega) := \frac{1}{3} \left( c^2 + 2 - \sqrt{4(1-c^2)^2 + \frac{6}{\omega}} \right), \quad (20)$$

if and only if

$$\omega \geq \omega_c^{(2)}(c) := \frac{2}{c^2(4-c^2)}. \quad (21)$$

Otherwise, there is none and at equilibrium no corner can arise where  $\mathcal{C}$  meets the  $x$  axis. The inner corner angle  $\alpha$  depicted in Fig. 1b is given by

$$\alpha = 2 \arccos \sqrt{\chi_2}, \quad (22)$$

where  $\chi_2$  is as in (20); in particular, (22) implies that

$$\lim_{\omega \rightarrow \infty} \alpha(c, \omega) = 2 \arccos c = 2\vartheta, \quad (23)$$

where  $\vartheta$  is the ideal cone angle.

The graphs of both  $\omega_c^{(1)}$  and  $\omega_c^{(2)}$  as functions of  $c$  are plotted in Fig. 2.

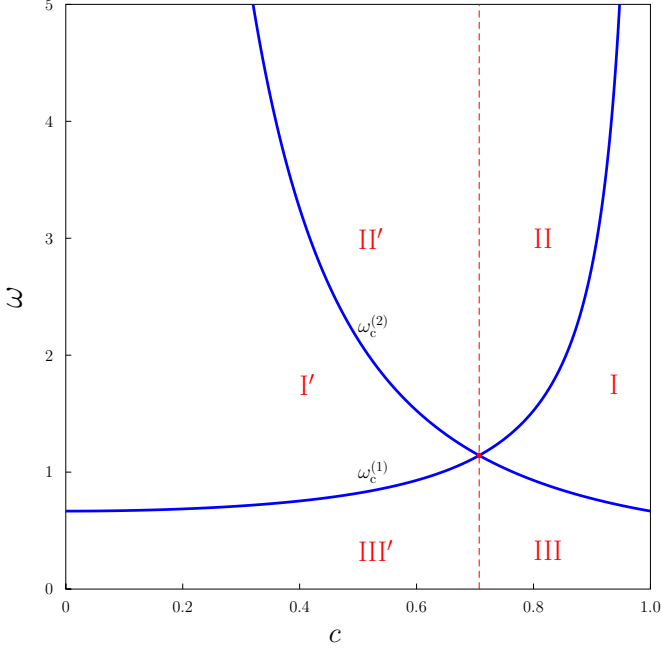

Fig. 2: Phase diagram in the plane  $(c, \omega)$ . Regions I, II, and III ranging over  $\frac{1}{\sqrt{2}} \leq c \leq 1$  are delimited by the graphs of the functions  $\omega_c^{(1)}$  and  $\omega_c^{(2)}$  in (15) and (21). These graphs, which cross at the (red) triple point  $(\frac{1}{\sqrt{2}}, \frac{8}{7})$ , are transformed one into the other by the mapping  $c \mapsto \sqrt{1-c^2}$ . The corresponding images I', II', and III' of regions I, II, and III, on the other side of the dashed separatrix  $c = \frac{1}{\sqrt{2}}$ , cover together with I, II, and III the whole admissible parameter plane  $(c, \omega)$ . The equilibrium shape of the drop has no corners in III, but has two and four symmetric corners in I and II, respectively. All transitions from one region to an adjacent region take place continuously: they are *second-order*.

### 3 Equilibrium arcs

To arrive at a tractable form of the equilibrium equation in (10) for the regular arcs of  $\mathcal{C}$ , we found it convenient to describe a quarter of a doubly symmetric curve  $\mathcal{C}$  as in Fig. 1a in the form of a Cartesian graph  $y = y(x)$ . With  $\mathcal{C}$  thus reparameterized, the functional  $F$  in (1) subject to the constraint of the area enclosed by  $\mathcal{C}$  can equivalently be rewritten as

$$F^*[y] := \int_0^a \left\{ \left[ 1 + \frac{1}{2}\omega \left( \frac{1}{1+y'^2} - c^2 \right)^2 \right] \sqrt{1+y'^2} + \lambda y \right\} dx, \quad (24)$$

which has also absorbed the area functional  $A$  and the Lagrange multiplier  $\lambda$  associated with it. In (24), a prime now denotes differentiation with respect to  $x$  and the

function  $y(x)$  is subject to

$$y(a) = 0, \quad (25)$$

where  $a > 0$  is to be determined.

Since we have already obtained the geometric conditions valid at the equilibrium corners of  $\mathcal{C}$ , here we are only interested in finding the equilibrium arcs of  $\mathcal{C}$  in their Cartesian parametrization. The Euler-Lagrange equation associated with  $F^*$  is easily obtained and integrated once, leading to

$$\Phi(y'; c, \omega) = \lambda x + b, \quad (26)$$

where

$$\Phi(u; c, \omega) := \frac{1}{2} \frac{1}{\sqrt{(1+u^2)^5}} [2 - 3\omega + 2\omega c^2 + \omega c^4 + 2(2 + \omega c^2 + \omega c^4)u^2 + (2 + \omega c^4)u^4] u \quad (27)$$

and  $b$  is an arbitrary integration constant. Altering both  $x$  and  $y$  by the same factor, say  $\mu$ , so as to produce a homothetic dilation (or contraction) of  $\mathcal{C}$  does not alter the left side of (26). Consequently,  $\lambda$  must be changed into  $\lambda/\mu$  for  $\mathcal{C}$  to remain an equilibrium curve. This shows that  $\lambda$  can be determined (and the area constraint can be satisfied) by simply rescaling any solution  $y = y(\xi)$  of (26) with  $\xi := \lambda x + b$ . Similarly, since the differential equation (26) does not contain  $y$  explicitly, the constraint (25) can be satisfied by translating in space a solution.

Figure 3 illustrates a graphical argument to integrate (26). For an arbitrary  $\xi$ , the light gray area represents the integral of  $y'$  in  $\xi$ ; such an area can be obtained by subtracting the dark gray area which represents the integral of  $\Phi$  in  $u$  from the whole area  $u\Phi(u)$  of the rectangle delimited by the coordinate lines through  $(u, \xi)$ . Thus, to within additive constants to be chosen so as to adjust the solution to the geometric constraint, a regular arc of  $\mathcal{C}$  can be represented in the parametric form

$$y = Y(u; c, \omega) := u\Phi(u; c, \omega) - \Psi(u; c, \omega), \quad (28a)$$

$$\xi = \Phi(u; c, \omega), \quad (28b)$$

where  $\Psi$  is the primitive of  $\Phi$  in  $u$ . It is easily seen that, for a regular arc with  $x > 0$  and  $y < 0$  as shown in Fig. 1,  $Y$  can be given the following explicit representation

$$Y(u; c, \omega) = -\frac{1}{2} \frac{1}{\sqrt{(1+u^2)^5}} [2 + \omega - 2\omega c^2 + \omega c^4 + 2(2 + 2\omega - 3\omega c^2 + \omega c^4)u^2 + (2 - 4\omega c^2 + \omega c^4)u^4]. \quad (29)$$

With the aid of (27) and (29), by direct inspection one easily sees that the functions  $\Phi$  and  $Y$  enjoy the following

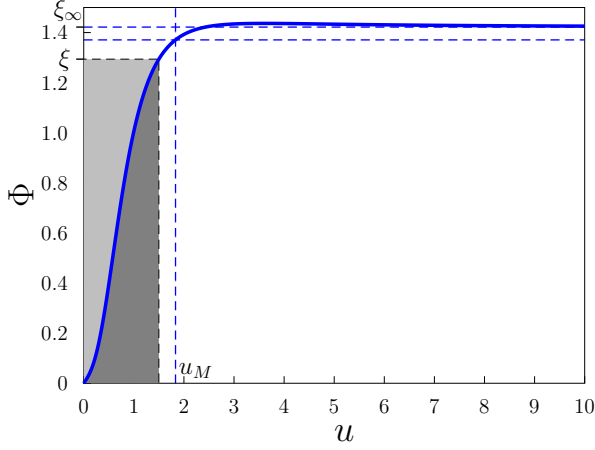

Fig. 3: The plot of the function  $\Phi$  against  $u$  for  $(c, \omega)$  in region I of the phase diagram in Fig. 2. The asymptote  $\xi_\infty$  is delivered by (32); the single value  $u_M$  of  $y'$  where a regular arc of  $\mathcal{C}$  may meet a corner on the  $x$  axis is identified by (31). This specific plot, while typical of the whole region I, was obtained for  $c = \frac{\sqrt{3}}{2}$  and  $\omega = \frac{3}{2}$ .

property,

$$\Phi\left(\frac{1}{u}; \sqrt{1-c^2}, \omega\right) = Y(u; c, \omega), \quad (30)$$

which combined with (28) mean that changing  $c$  into  $\sqrt{1-c^2}$  exchanges  $\xi$  with  $y$ .

As shown in Fig. 3, in region I a regular arc of  $\mathcal{C}$  can extend from  $\xi = 0$ , where  $y' = 0$ , to  $\xi = \Phi(u_M)$ , where  $y' = u_M$ , with  $u_M$  related to  $\chi_2$  in (20) through

$$u_M := \sqrt{\frac{1}{\chi_2} - 1}. \quad (31)$$

At  $\xi = \Phi(u_M)$ , it meets an equilibrium corner on the  $x$  axis, whereas it meets none on the  $y$  axis. In principle, nothing would prevent one from further extending a regular arc for  $\xi > \Phi(u_M)$ , but as soon as  $\xi$  crosses the asymptote of  $\Phi$  at

$$\xi_\infty := 1 + \frac{1}{2}\omega c^4, \quad (32)$$

two distinct values of  $y'$  can be associated with one and the same  $\xi$  in equilibrium, a multiplicity compatible only with a corner of  $\mathcal{C}$  away from the symmetry axes, a case that here we have excluded from our consideration as we reckon it likely that these shapes would be metastable. Thus, in region I all equilibrium shapes of  $\mathcal{C}$  considered here have two symmetric corners on the  $x$  axis [see Fig. 17a in the main paper]; they are tactoids

with axis along the direction of nematic alignment outside the drop.

In completely the same fashion, we analyze the equilibrium shape of  $\mathcal{C}$  in region II. Figure 4 illustrates the typical appearance of the graph of  $\Phi$  in such a region. Here  $u_m$ , which is related to  $\chi_1$  in (14) through

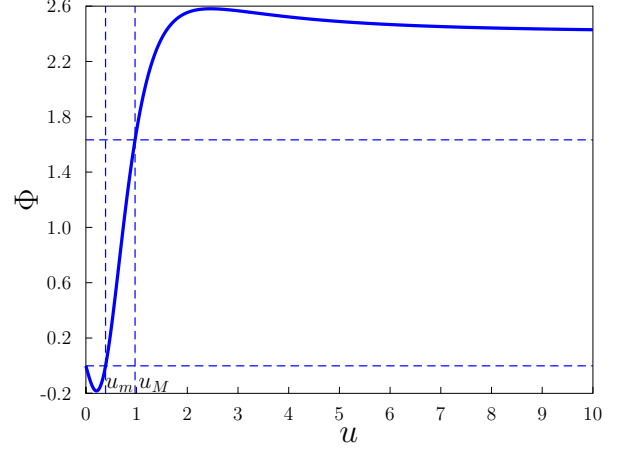

Fig. 4: The plot of the function  $\Phi$  against  $u$  for  $(c, \omega)$  in region II of the phase diagram in Fig. 2. There are two values of  $y'$ , namely,  $u_m$  and  $u_M$  identified by (33) and (31), where an equilibrium regular arc of  $\mathcal{C}$  can meet with corners on the two symmetry axes. Though characteristic of the whole region II, this specific graph was drawn for  $c = \frac{\sqrt{3}}{2}$  and  $\omega = 5$ .

$$u_m := \sqrt{\frac{1}{\chi_1} - 1}, \quad (33)$$

identifies the value of  $y'$  where an equilibrium regular arc can meet a corner of the  $y$  axis. These corners together with those on the  $x$  axis, where  $y' = u_M$ , make the equilibrium shape of the drop resemble a diamond [see Fig. 17b in the main paper]. Precisely, as above, one could try and extend an equilibrium regular arc of  $\mathcal{C}$  also for  $y' < u_m$ , but again the lack of monotonicity of  $\Phi$  for  $0 < u < u_m$  is likely to bring  $\mathcal{C}$  in the realm of metastability.

Figure 5 illustrates the typical graph of  $\Phi$  against  $u$  in region III of the phase diagram in Fig. 2. Here  $\Phi$  is monotonic and so  $y'$  grows steadily from nought to infinity as  $\xi$  traverses the interval  $[0, \xi_\infty]$ , with  $\xi_\infty$  still given by (32). The whole curve  $\mathcal{C}$  is smooth at equilibrium, as shown for example by Fig. 17c in the main paper.

By (28), for  $\frac{1}{\sqrt{2}} \leq c \leq 1$ , the aspect ratio  $\rho$  of the extensions of the drop along  $\mathbf{n}$  and orthogonally to  $\mathbf{n}$  can be expressed as

$$\rho(c, \omega) := \left| \frac{\Phi(u_{\max}; c, \omega)}{Y(u_{\min}; c, \omega)} \right|, \quad (34)$$

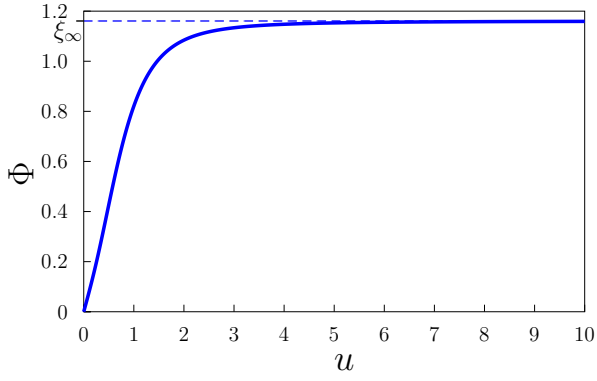

Fig. 5: The plot of the function  $\Phi$  against  $u$  for  $(c, \omega)$  in region III of the phase diagram in Fig. 2.  $\Phi$  is monotonically increasing in the whole range  $u \geq 0$ , saturating at  $\xi_\infty$ , still given by (32).

where

$$u_{\max} := \begin{cases} u_M & \text{in I} \cup \text{II}, \\ \infty & \text{in III}, \end{cases} \quad u_{\min} := \begin{cases} 0 & \text{in I} \cup \text{III}, \\ u_m & \text{in II}. \end{cases} \quad (35)$$

As a consequence of (30),  $\rho$  is easily seen to satisfy equation (16) in the main text.
